# Supplementary material
Source: publisher figshare collection journal article supplement (https://acs.figshare.com/ndownloader/files/14116589)

# Synthesis and Evaluation of a QS-17/18-Based Vaccine Adjuvant

Pengfei Wang,\* Āani Škalamera, Xianwei Sui, Ping Zhang,\* and Suzanne M. Michalek

|                                                             |        |
|-------------------------------------------------------------|--------|
| Table of content                                            | S1     |
| Mice weights at various time points                         | S2     |
| <sup>1</sup> H and <sup>13</sup> C NMR spectra of <b>13</b> | S3-4   |
| <sup>1</sup> H and <sup>13</sup> C NMR spectra of <b>15</b> | S5-6   |
| <sup>1</sup> H and <sup>13</sup> C NMR spectra of <b>16</b> | S7-8   |
| <sup>1</sup> H and <sup>13</sup> C NMR spectra of <b>17</b> | S9-10  |
| <sup>1</sup> H and <sup>13</sup> C NMR spectra of <b>24</b> | S11-12 |
| <sup>1</sup> H and <sup>13</sup> C NMR spectra of <b>7</b>  | S13-14 |

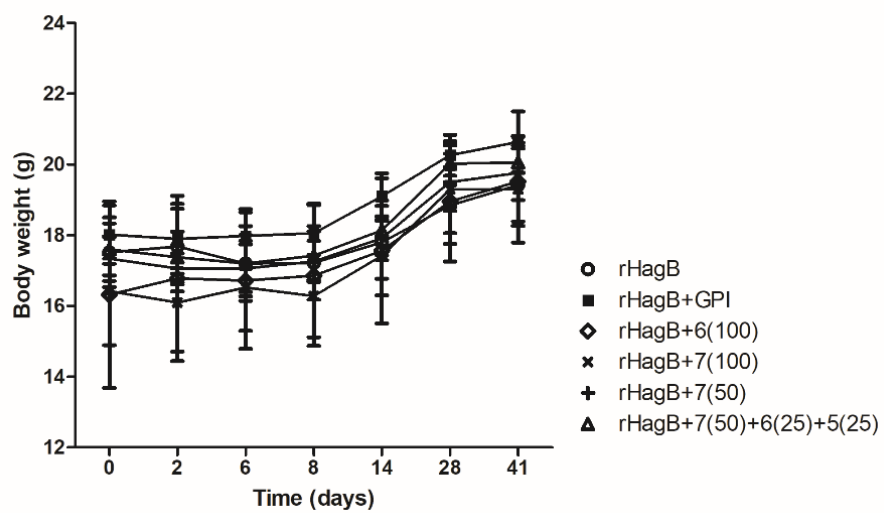

**Figure S1.** Mice weights at various time points.

7.380  
7.381  
7.371  
7.354  
7.344  
7.334  
7.331  
7.323  
7.318  
7.314  
7.312  
7.311  
7.303  
7.293  
7.288  
7.283  
7.280  
7.276  
7.272  
7.267  
7.265  
7.257  
7.256  
7.247  
7.239  
7.229  
4.954  
4.937  
4.910  
4.899  
4.888  
4.879  
4.812  
4.802  
4.800  
4.796  
4.788  
4.781  
4.773  
4.764  
4.703  
4.692  
4.685  
4.656  
4.649  
4.641  
4.632  
4.617  
4.607  
4.590  
3.962  
3.914  
3.906  
3.608  
3.561  
3.500  
1.315  
1.306

Current Data Parameters

NAME PW-VIII-50R  
EXPNO 2  
PROCNO 1

F2 - Acquisition Parameters

Date\_ 20140312  
Time\_ 9.40  
INSTRUM spect  
PROBHD 5 mm CPIC1 1H  
PULPROG zgpg30  
TD 65536  
SOLVENT CDCl3  
NS 16  
DS 2  
SWH 14423.077 Hz  
FIDRES 0.220079 Hz  
AQ 2.2719147 sec  
RG 16  
DW 34.667 usec  
DE 6.50 usec  
TE 298.0 K  
D1 1.00000000 sec  
TD0 1

CHANNEL f1

NUC1 1H  
P1 8.00 usec  
PL1 1.30 dB  
PL1W 6.88972235 W  
SFO1 700.0243229 MHz

F2 - Processing parameters

SI 32768  
SF 700.0200813 MHz  
WDW no  
SSB 0 Hz  
LB 0  
GB 0  
PC 1.00

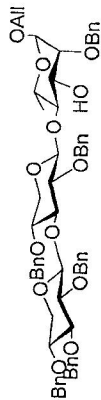

13

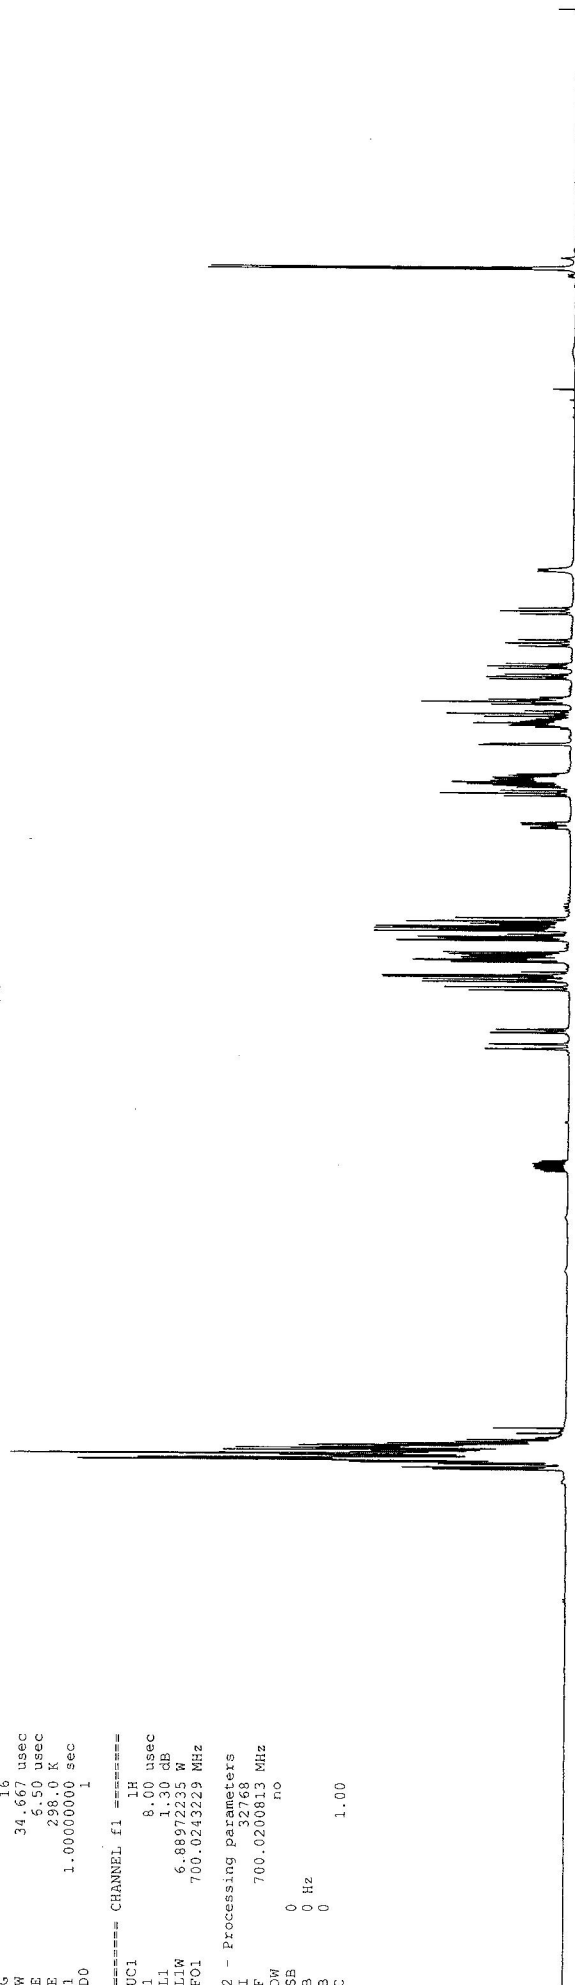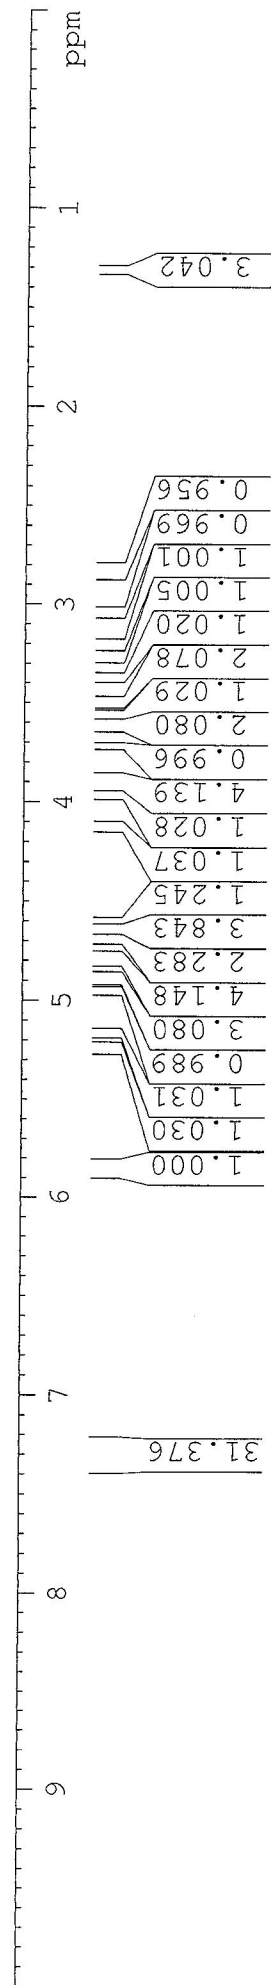

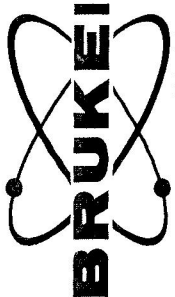

NAME PW-VIII-50C13  
EXPNO 2  
PROCNO 1  
Date\_ 20140312  
Time 10.37  
INSTRUM spect  
PROBHD 5 mm CPTCI 1H-  
PULPROG zgpg30  
TD 65536  
SOLVENT CDC13  
NS 69  
DS 4  
SWH 41666.668 Hz  
FIDRES 0.635783 Hz  
AQ 0.7864820 s  
RG 4  
DW 12.000 u  
DE 6.50 u  
TE 298.0 K  
D1 2.00000000 s  
D11 0.03000000 s  
TD0 1

==== CHANNEL f1 =====  
NUC1 13C  
P1 11.00 u  
PL1 -1.30 C  
PL1W 128.76077271 Hz  
SFO1 176.0377710 MHz

==== CHANNEL f2 =====  
CPDPRG2 waltz16  
NUC2 1H  
PCPD2 65.00 u  
PL2 1.30 C  
PL12 19.50 C  
PL13 19.50 C  
PL2W 6.88972235 MHz  
PL12W 0.10428017 MHz  
PL13W 0.10428017 MHz  
SFO2 700.0228001 MHz  
SI 32768  
SF 176.0201690 MHz  
WDW no  
SSB 0  
LB 0.00 Hz  
GB 0  
PC 1.40

139.76  
139.71  
138.55  
138.26  
138.00  
133.89  
128.74  
128.61  
128.60  
128.50  
128.47  
128.41  
128.36  
128.35  
128.32  
128.10  
128.04  
128.03  
127.98  
127.78  
127.74  
127.61  
117.43  
104.15  
103.07  
96.58  
84.01  
83.24  
83.68  
81.65  
79.84  
78.30  
78.27  
77.42  
77.24  
77.06  
75.74  
75.44  
75.34  
75.20  
73.26  
73.25  
73.25  
71.83  
67.94  
66.84  
63.85  
17.83

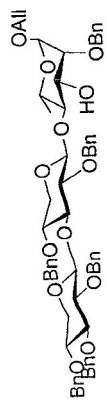

13

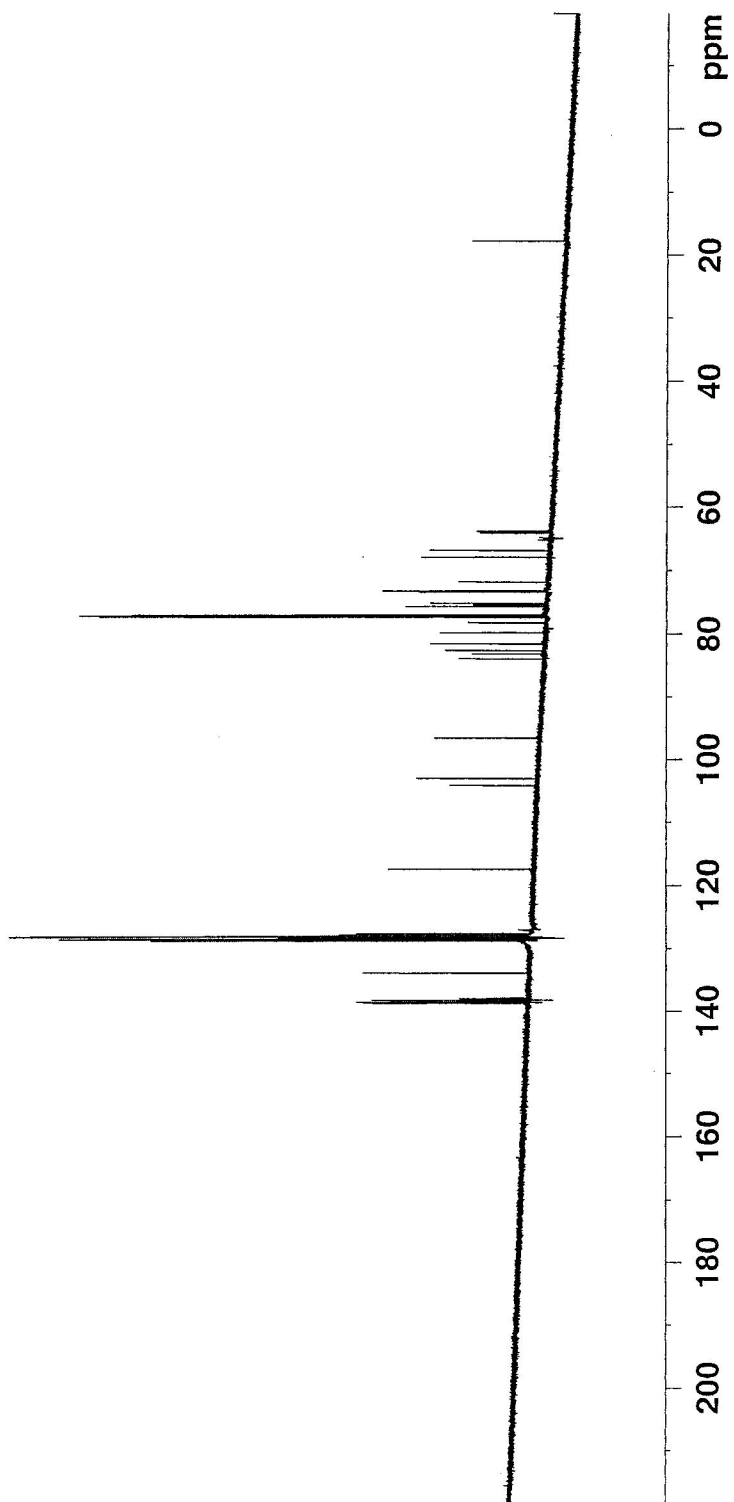

Current Data Parameters  
 NAME PW-IX-81-H  
 EXPNO 1  
 PROCNO 1

F2 - Acquisition Parameters  
 Date\_ 20171130  
 Time 10.01  
 INSTRUM spect  
 PROBHD 5 mm CPTCI 1H-  
 PULPROG zg30  
 TD 65536  
 SOLVENT CDCl3  
 NS 16  
 DS 2  
 SWH 14097.744 Hz  
 FIDRES 0.215115 Hz  
 AQ 2.3243434 sec  
 RG 18  
 DW 35.467 usec  
 DE 10.00 usec  
 TE 298.1 K  
 D1 1.00000000 sec  
 TD0 1

===== CHANNEL f1 =====  
 SFO1 699.9243223 MHz  
 NUC1 1H  
 P1 8.00 usec  
 PL1 0  
 PLW1 6.90000010 W

F2 - Processing Parameters  
 SI 65536  
 SF 699.9200644 MHz  
 WDW no  
 SSB 0  
 LB 0 Hz  
 GB 0  
 FC 1.00

55

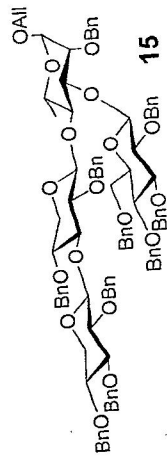

15

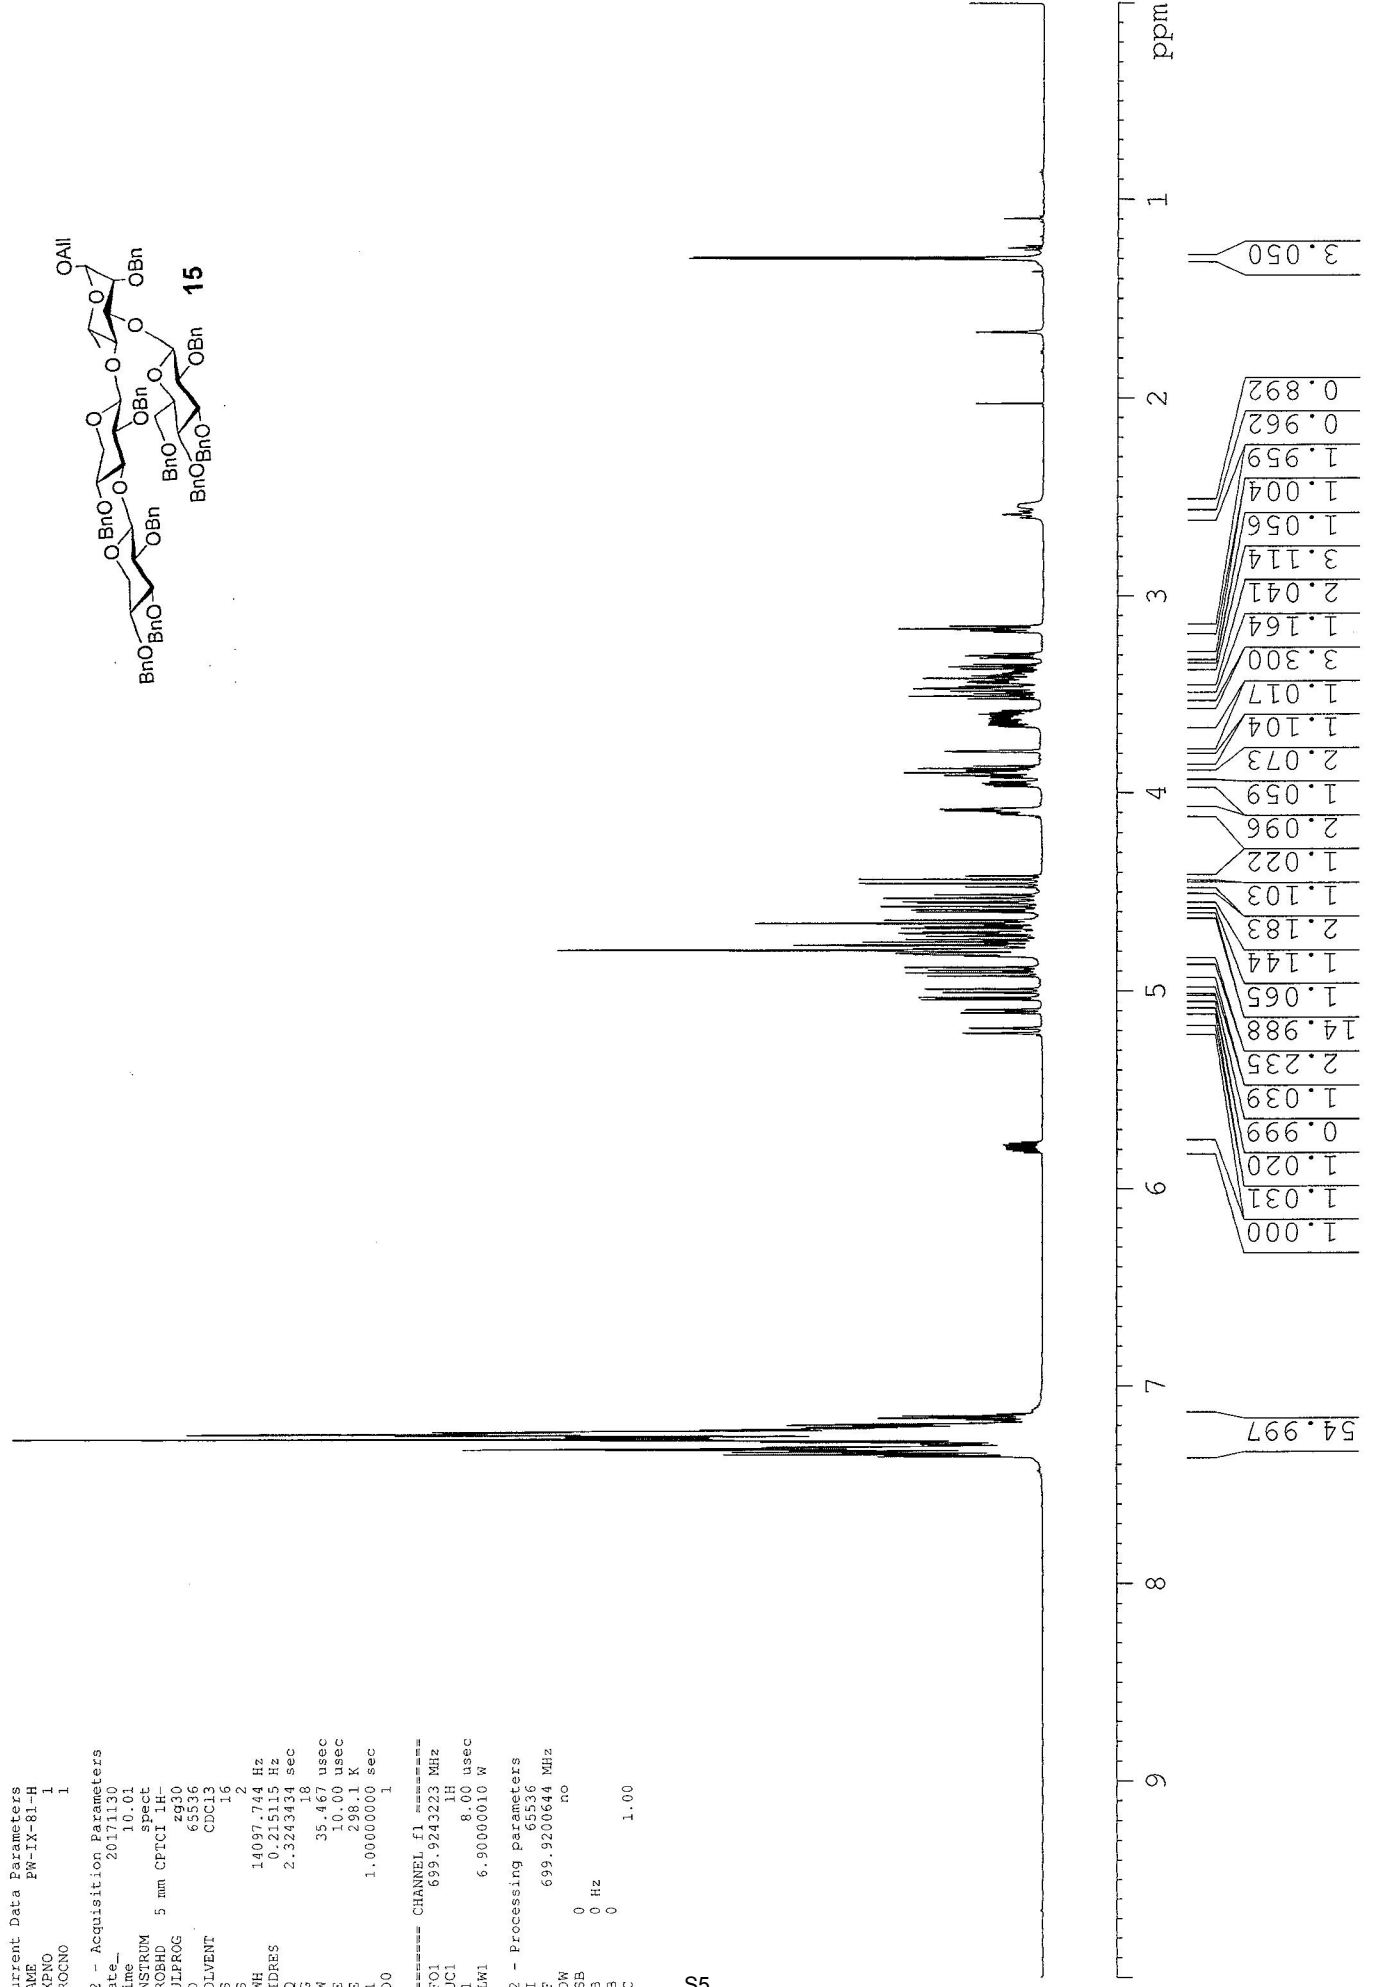

Current Data Parameters  
 NAME PW-IX-81-C13  
 EXPNO 1  
 PROCNO 1

F2 - Acquisition Parameters

Date\_ 20171130  
 Time 10.31  
 INSTRUM spect  
 PROBHD 5 mm CPTCI 1H-  
 PULPROG zgpg30  
 TD 65536  
 SOLVENT CDCl3  
 NS 2674  
 DS 4  
 SWH 41666.568 Hz  
 FIDRES 0.635783 Hz  
 AQ 0.7864320 sec  
 RG 203  
 DW 12.000 usec  
 DE 18.00 usec  
 TE 298.1 K  
 D1 2.00000000 sec  
 D11 0.03000000 sec  
 TD0 1

===== CHANNEL f1 =====  
 SF01 176.0126227 MHz  
 NUC1 13C  
 P1 14.00 usec  
 PLW1 95.00000000 W

===== CHANNEL f2 =====  
 SF02 699.9227997 MHz  
 NUC2 1H  
 CPDPRG2 waltz16  
 PCPD2 65.00 usec  
 PLW2 6.90000010 W  
 PLW12 0.10452000 W  
 PLW13 0.04415000 W

F2 - Processing parameters  
 SI 32768  
 SF 175.9950510 MHz  
 WDW no  
 SSB 0  
 LB 0 Hz  
 GB 0  
 PC 1.40

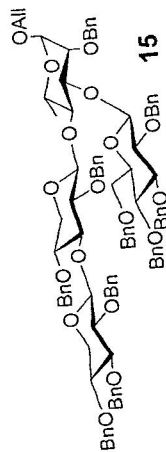

15

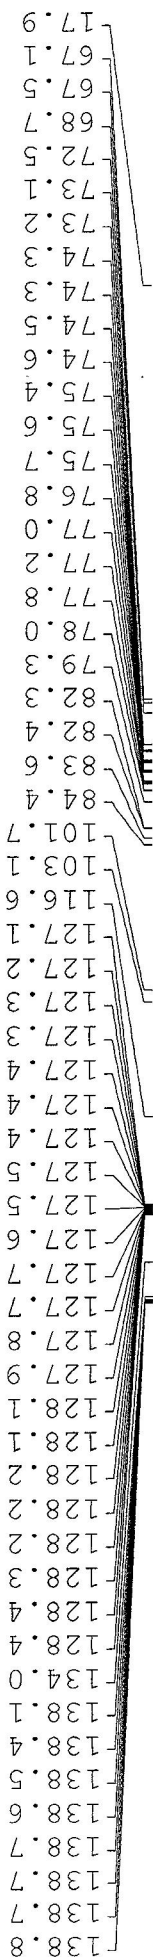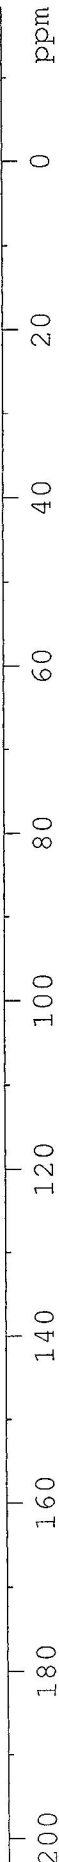

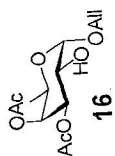

Current Data Parameters  
 NAME PW-IX-187-SM  
 EXPNO 1  
 PROCNO 1

F2 - Acquisition Parameters  
 Date\_ 20171205  
 Time 10.37  
 INSTRUM spect  
 PROBRD 5 mm CPTCLH-  
 PULPROG zg30  
 TD 65536  
 SOLVENT CDCl3  
 NS 16  
 DS 2  
 SWH 14097.744 Hz  
 FIDRES 0.215115 Hz  
 AQ 2.3243434 sec  
 RG 32  
 DW 35.467 usec  
 DE 10.00 usec  
 TE 298.0 K  
 FI 1  
 TD 1.00000000 sec  
 1

===== CHANNEL f1 =====  
 SFO1 699.9243223 MHz  
 NUC1 1H  
 P1 8.00 usec  
 PLW1 6.90000010 W

F2 - Processing parameters  
 SI 65536  
 SF 699.9200003 MHz  
 WDW no  
 SSB 0  
 LB 0 Hz  
 GB 0  
 FC 1.00

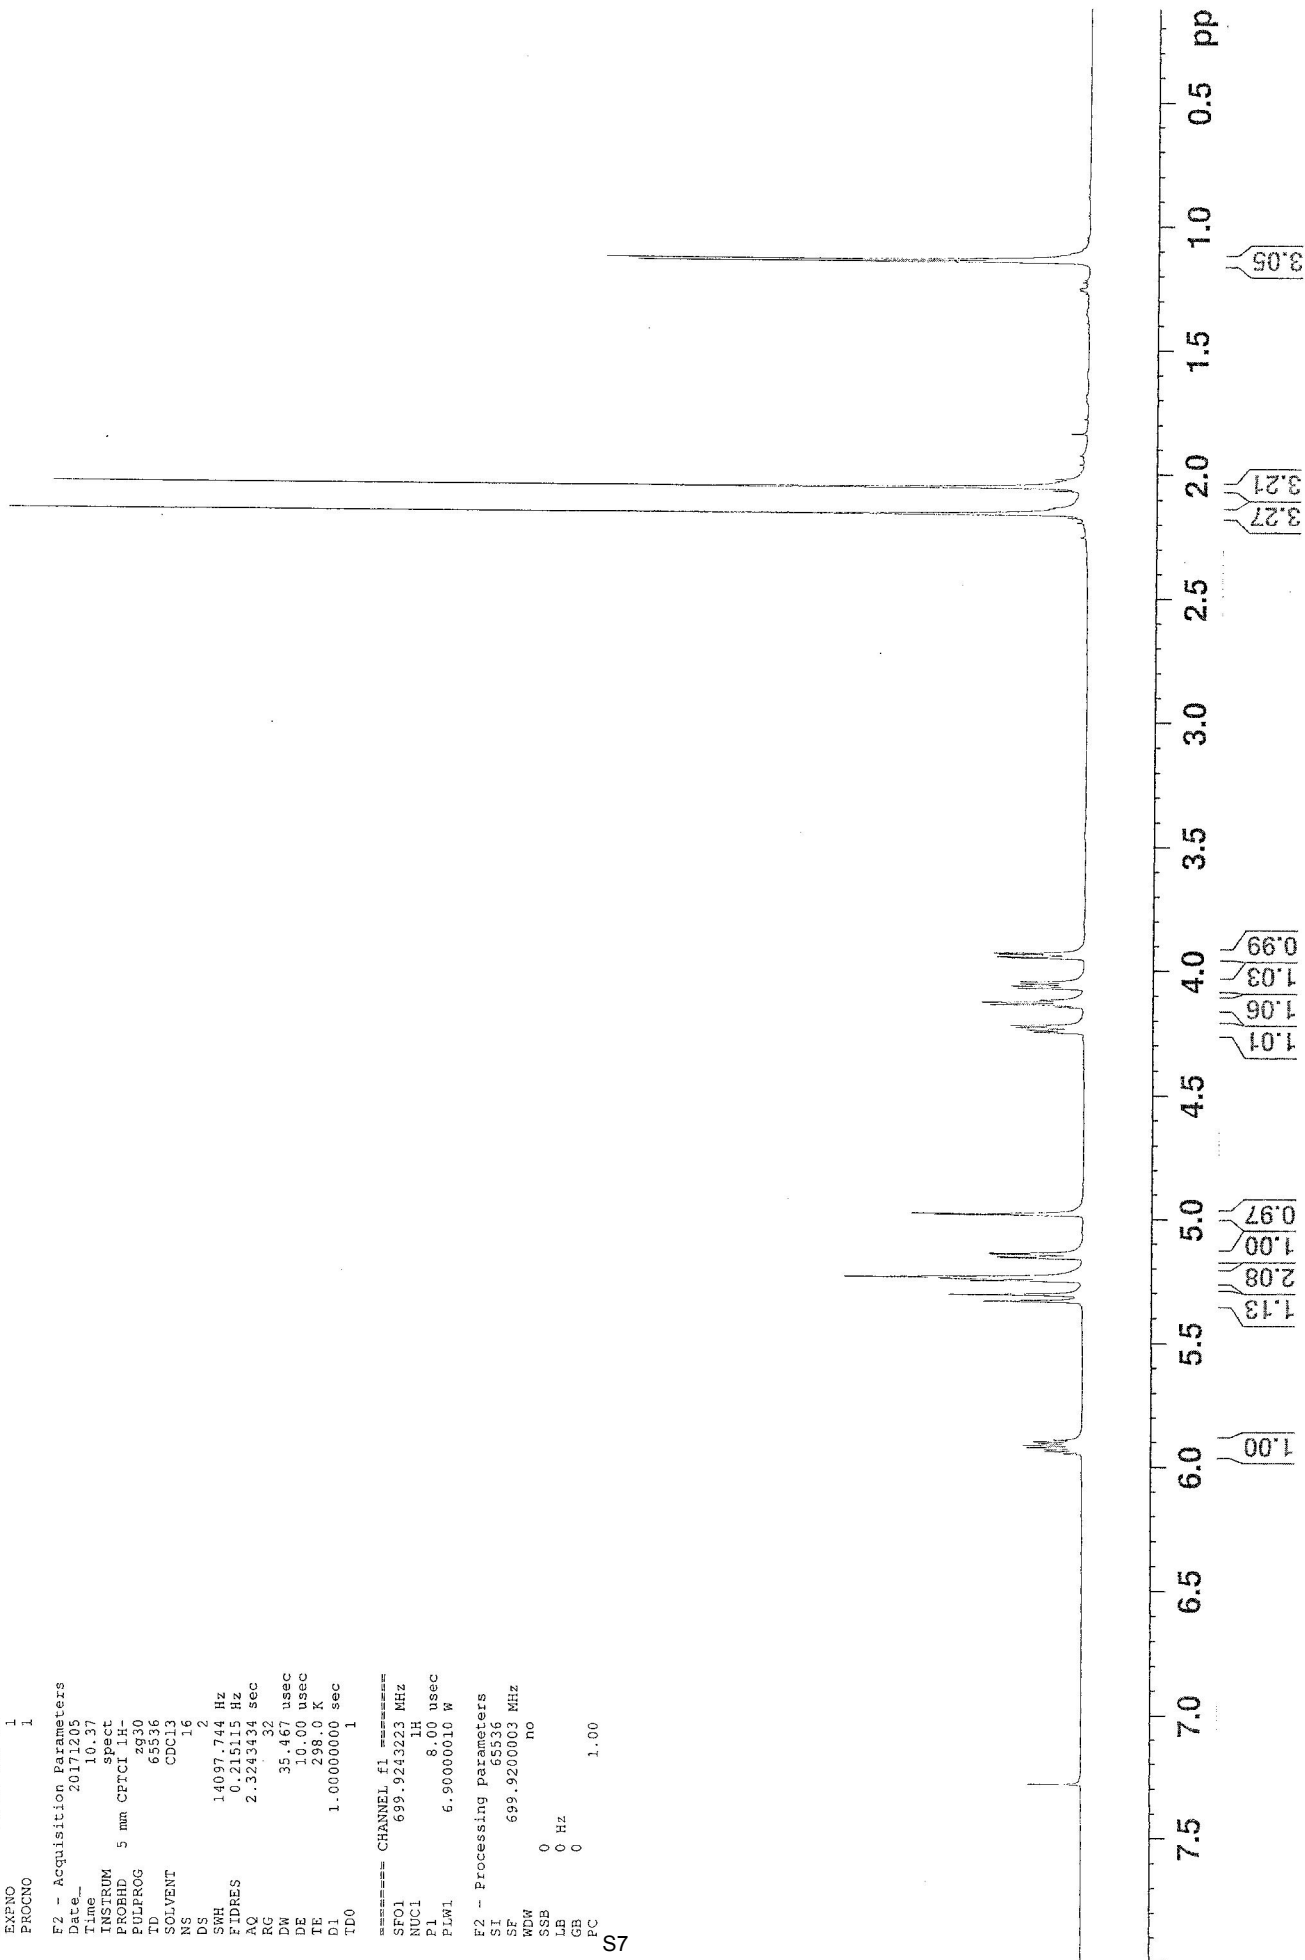

Current Data Parameters  
 NAME PW-IX-187-SM-Cl3  
 EXPNO 1  
 PROCNO 1

F2 - Acquisition Parameters  
 Date\_ 20171205  
 Time\_ 10.45  
 INSTRUM spect  
 PROBHD 5 mm CPTCI 1H-  
 PULPROG zgpg30  
 TD 65536  
 SOLVENT CDCl3  
 NS 128  
 DS 4  
 SWH 41666.668 Hz  
 FIDRES 0.635783 Hz  
 AQ 0.7864320 sec  
 RG 203  
 DW 12.000 usec  
 DE 18.00 usec  
 TE 298.0 K  
 D1 2.00000000 sec  
 D11 0.03000000 sec  
 TD0 1

===== CHANNEL f1 =====  
 SF01 176.0126227 MHz  
 NUC1 13C  
 P1 14.00 usec  
 PLW1 95.00000000 W

===== CHANNEL f2 =====  
 SF02 699.9227997 MHz  
 NUC2 1H  
 GPCPRG[2] waltz16  
 PCPD2 65.00 usec  
 PLW2 6.90000010 W  
 PLW12 0.10452000 W  
 PLW13 0.04416000 W

F2 - Processing parameters  
 SI 32768  
 SF 175.9950354 MHz  
 WDW no  
 SSB 0  
 LB 0 Hz  
 GB 0  
 PC 1.40

170.8  
 170.5  
 133.3  
 133.3  
 118.2  
 118.2  
 97.7  
 77.2  
 77.0  
 76.8  
 71.3  
 71.2  
 68.8  
 66.9  
 66.9  
 64.9  
 64.9

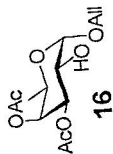

20.8  
 20.6  
 15.8

200 180 160 140 120 100 80 60 40 20 0 ppm

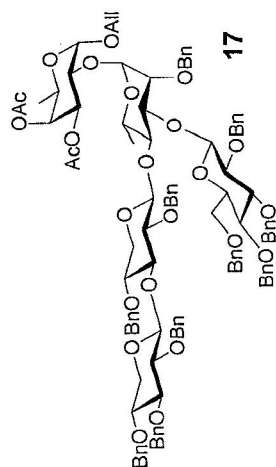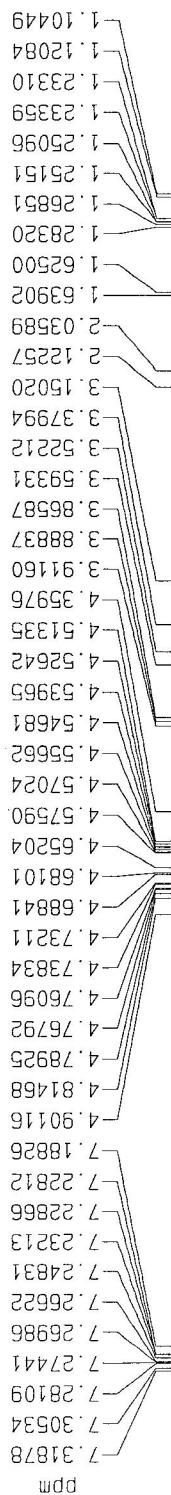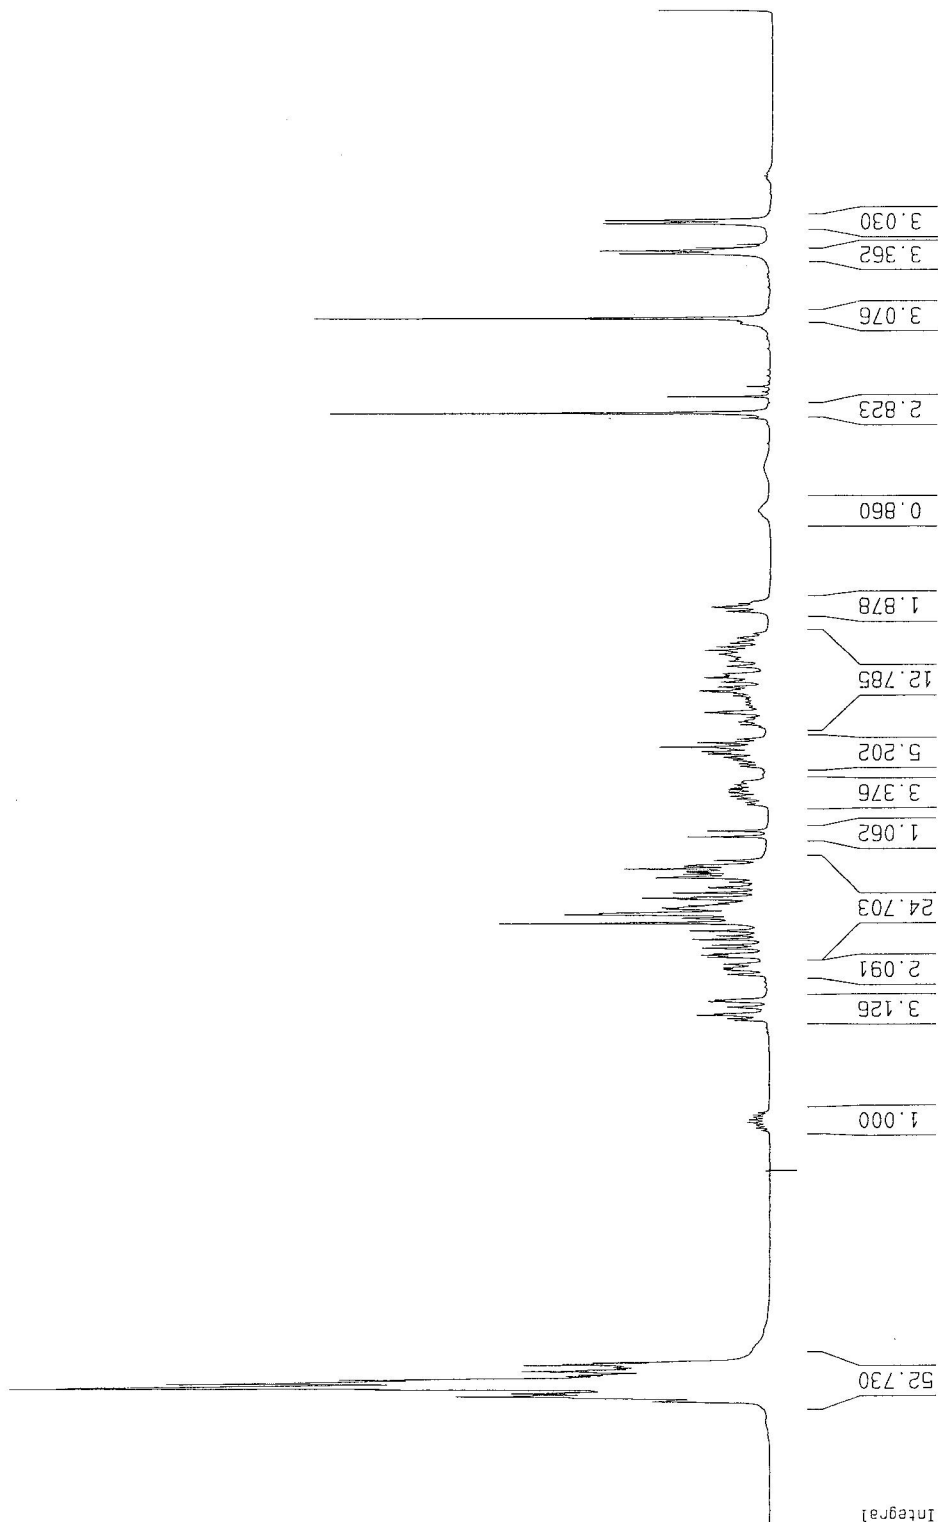

Current Data Parameters  
 NAME PW-VIII-63-H  
 EXPNO 1  
 PROCNO 1

F2 - Acquisition Parameters  
 Date\_ 20160203  
 Time 9.01  
 INSTRUM drx400  
 PROBHD 5 mm Multinu  
 PULPROG zg30  
 TD 65536  
 SOLVENT CDCl3  
 NS 16  
 DS 2  
 SWH 8278.146 Hz  
 FIDRES 0.126314 Hz  
 AQ 3.9584243 sec  
 RG 40.3  
 DW 60.400 usec  
 DE 6.00 usec  
 TE 300.0 K  
 D1 1.0000000 sec

===== CHANNEL f1 =====  
 NUC1 1H  
 P1 6.50 usec  
 PL1 0.00 dB  
 SF01 400.1324710 MHz

F2 - Processing parameters  
 SI 131072  
 SF 400.1300215 MHz  
 WDW no  
 SSB 0  
 LB 0.00 Hz  
 GB 0  
 PC 1.00

1D NMR plot parameters  
 CX 20.00 cm  
 F1P 8.000 ppm  
 F1 3201.04 Hz  
 F2P 0.000 ppm  
 F2 0.00 Hz  
 PPMCM 0.40000 ppm/cm  
 HZCM 160.05202 Hz/cm

138.745  
138.584  
138.490  
138.396  
138.122  
133.419  
128.485  
128.384  
128.293  
128.261  
128.219  
128.160  
128.138  
128.117  
128.087  
127.958  
127.835  
127.818  
127.759  
127.751  
127.713  
127.633  
127.590  
127.546  
127.519  
127.498  
127.374  
127.344  
127.293  
127.266  
118.050  
103.135

```

Current Data Parameters
NAME      FW-VIII-63-C13
EXPNO     1
PROCNO    1

F2 - Acquisition Parameters
Date_     20160203
Time      8.33
INSTRUM   spect
PROBHD    5 mm CPTCI 1H-
PULPROG   zgpg30
TD         65536
SOLVENT   CDCl3
NS         337
DS         4
SWH        41666.668 Hz
FIDRES     0.635783 Hz
AQ         0.7864320 sec
RG         256
DM         12.000 usec
DE         20.00 usec
TE         298.0 K
D1         2.00000000 sec
D11        0.03000000 sec
TD0        1

===== CHANNEL f1 =====
SFO1      176.0377702 MHz
NUC1       13C
P1         14.00 usec
PLW1       95.00000000 W

===== CHANNEL f2 =====
SFO2      700.0228001 MHz
NUC2       1H
P2         65.00 usec
PLW2       6.90000010 W
===== CHANNEL f3 =====
SFO3      0.10452000 MHz
PLW3       0.04416000 W

F2 - Processing parameters
SI         32768
SF         176.0201865 MHz
WDW        0
SSB        0 Hz
LB         0
GB         0
PC         1.40
  
```

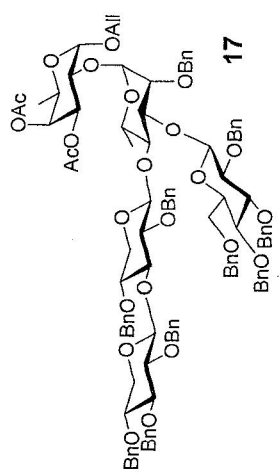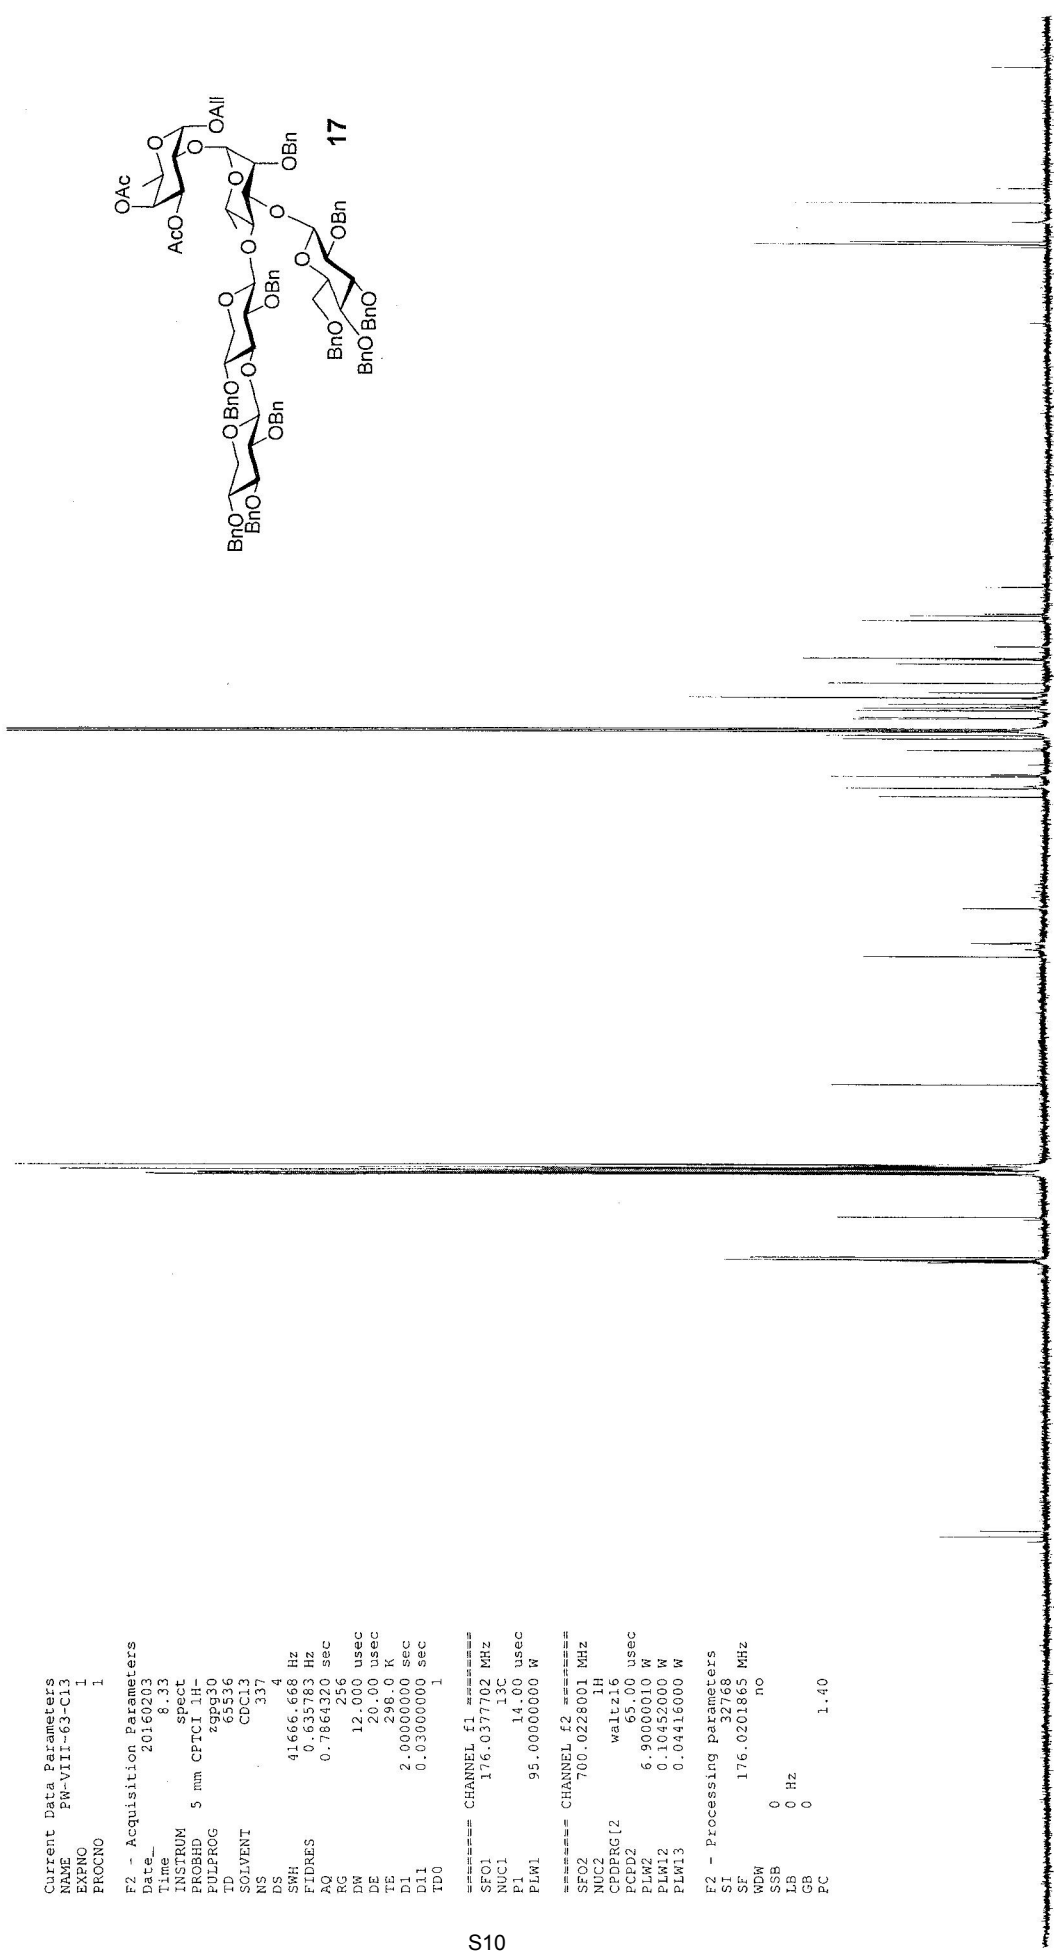

200 180 160 140 120 100 80 60 40 20 0 ppm

Current Data Parameters  
NAME PW-IX-103-C2H  
EXPNO 1  
PROCNO 1

F2 - Acquisition Parameters  
Date\_ 20170814  
Time 9.30  
INSTRUM spect  
PROBHD 5 mm CPTCI 1H-  
PULPROG zg30  
TD 65536  
SOLVENT CDCl3  
NS 7  
DS 2  
SWH 14097.744 Hz  
FIDRES 0.215115 Hz  
AQ 2.3243434 sec  
RG 22.6  
DW 35.467 usec  
DE 10.00 usec  
TE 298.0 K  
D1 1.00000000 sec  
TD0 1

===== CHANNEL f1 =====  
SF01 700.0243229 MHz  
NUC1 1H  
P1 8.00 usec  
PLW1 6.90000010 W

F2 - Processing parameters  
SI 65536  
SF 700.0200198 MHz  
WDW ho  
SSB 0  
LB 0 Hz  
GB 0  
PC 1.00

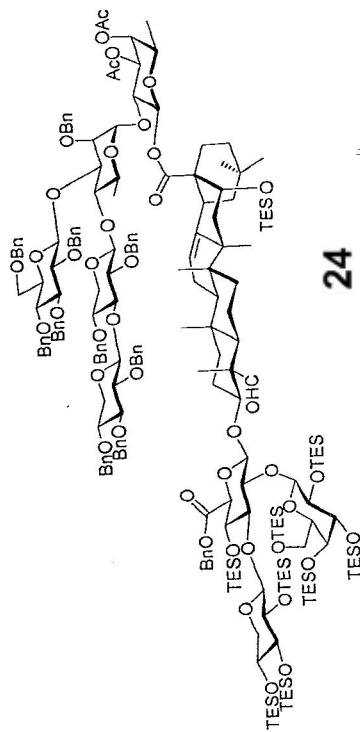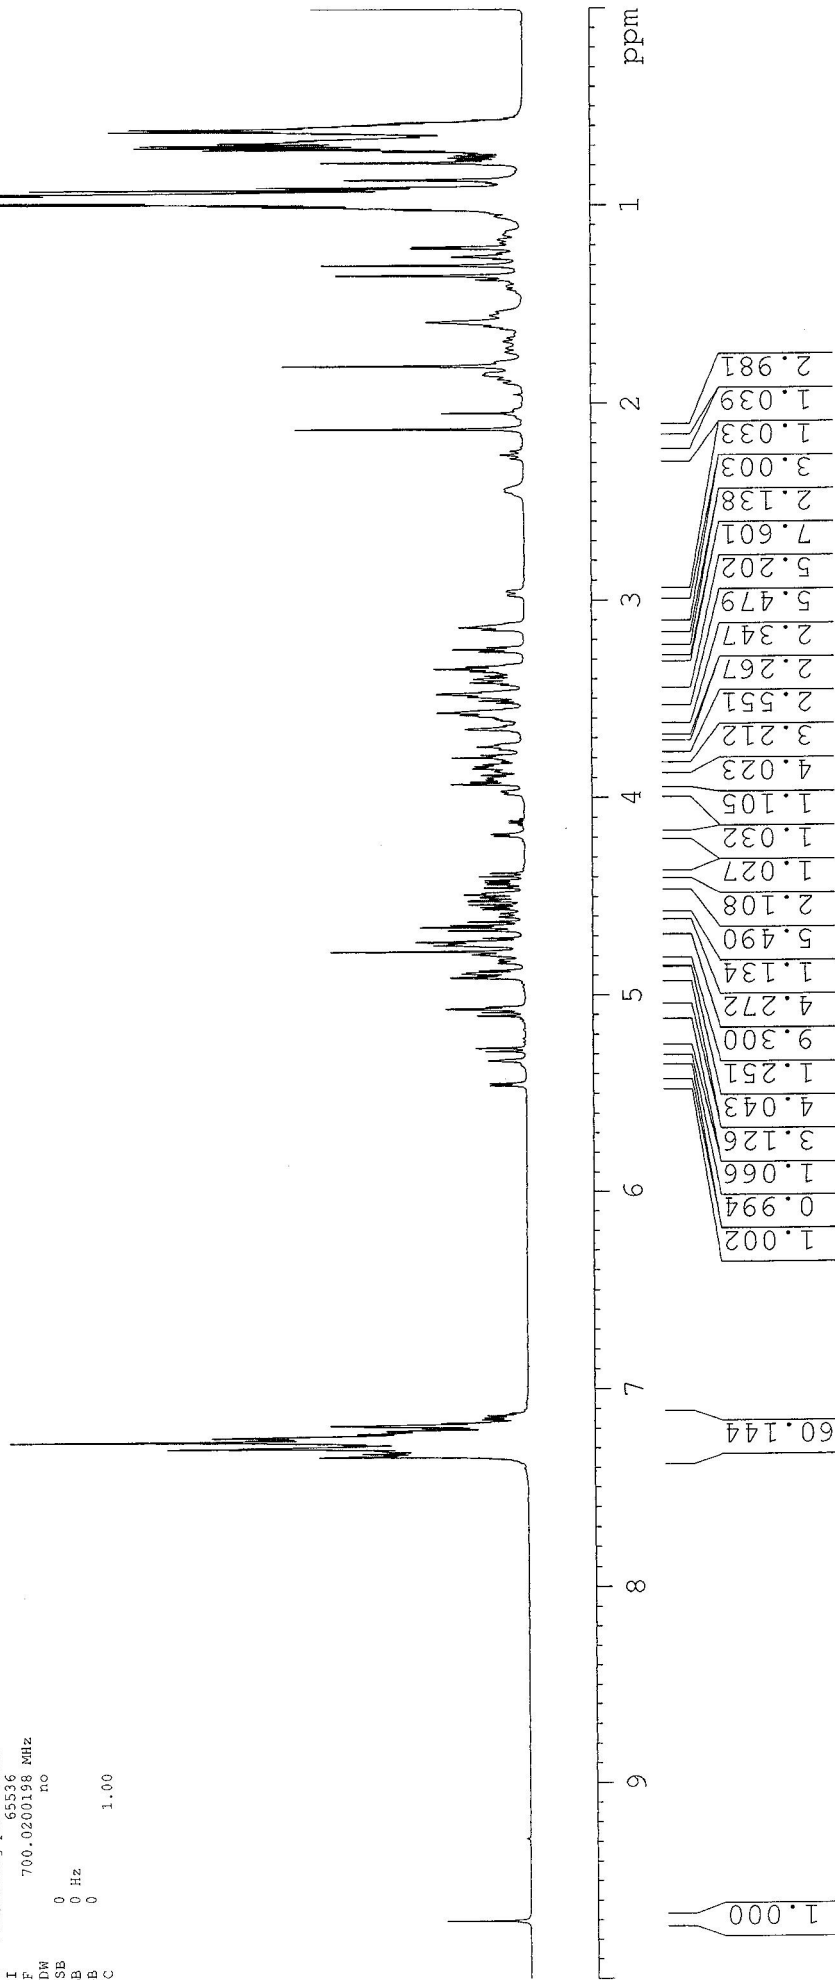

Current Data Parameters  
NAME PW-IX-103-C2-Q13  
EXPNO 1  
PROCNO 1

F2 - Acquisition Parameters  
Date\_ 20170814  
Time 10:23  
INSTRUM spect  
PROBHD 5 mm CPTQ1H-  
PULPROG zgpg30  
TD 65536  
SOLVENT CDCl3  
NS 5824  
DS 4  
SWH 41666.668 Hz  
FIDRES 0.625983 Hz  
AQ 0.7864520 sec  
RG 12.000 usec  
DW 18.00 usec  
DE 238.0 K  
TE 2.0000000 sec  
D1 0.03000000 sec  
D11 1  
TD0 1

CHANNEL f1  
SFO1 176.0377702 MHz  
NUC1 13C  
P1 14.00 usec  
PL1 95.00000000 W

CHANNEL f2  
SFO2 700.0228001 MHz  
NUC2 1H  
PCPDG12 wait16  
PCPD2 65.00 usec  
PLW2 6.90000010 W  
PLW12 0.10452000 W  
PLW13 0.04416000 W

F2 - Processing parameters  
SI 32768  
SF 176.0201733 MHz  
WDW EM  
SSB 0  
LB 1.00 Hz  
GB 0  
PC 1.40

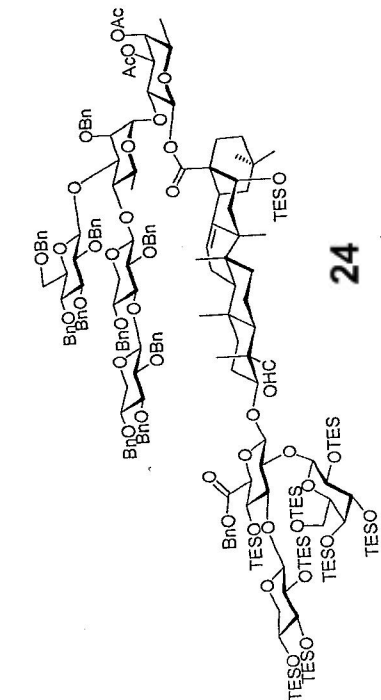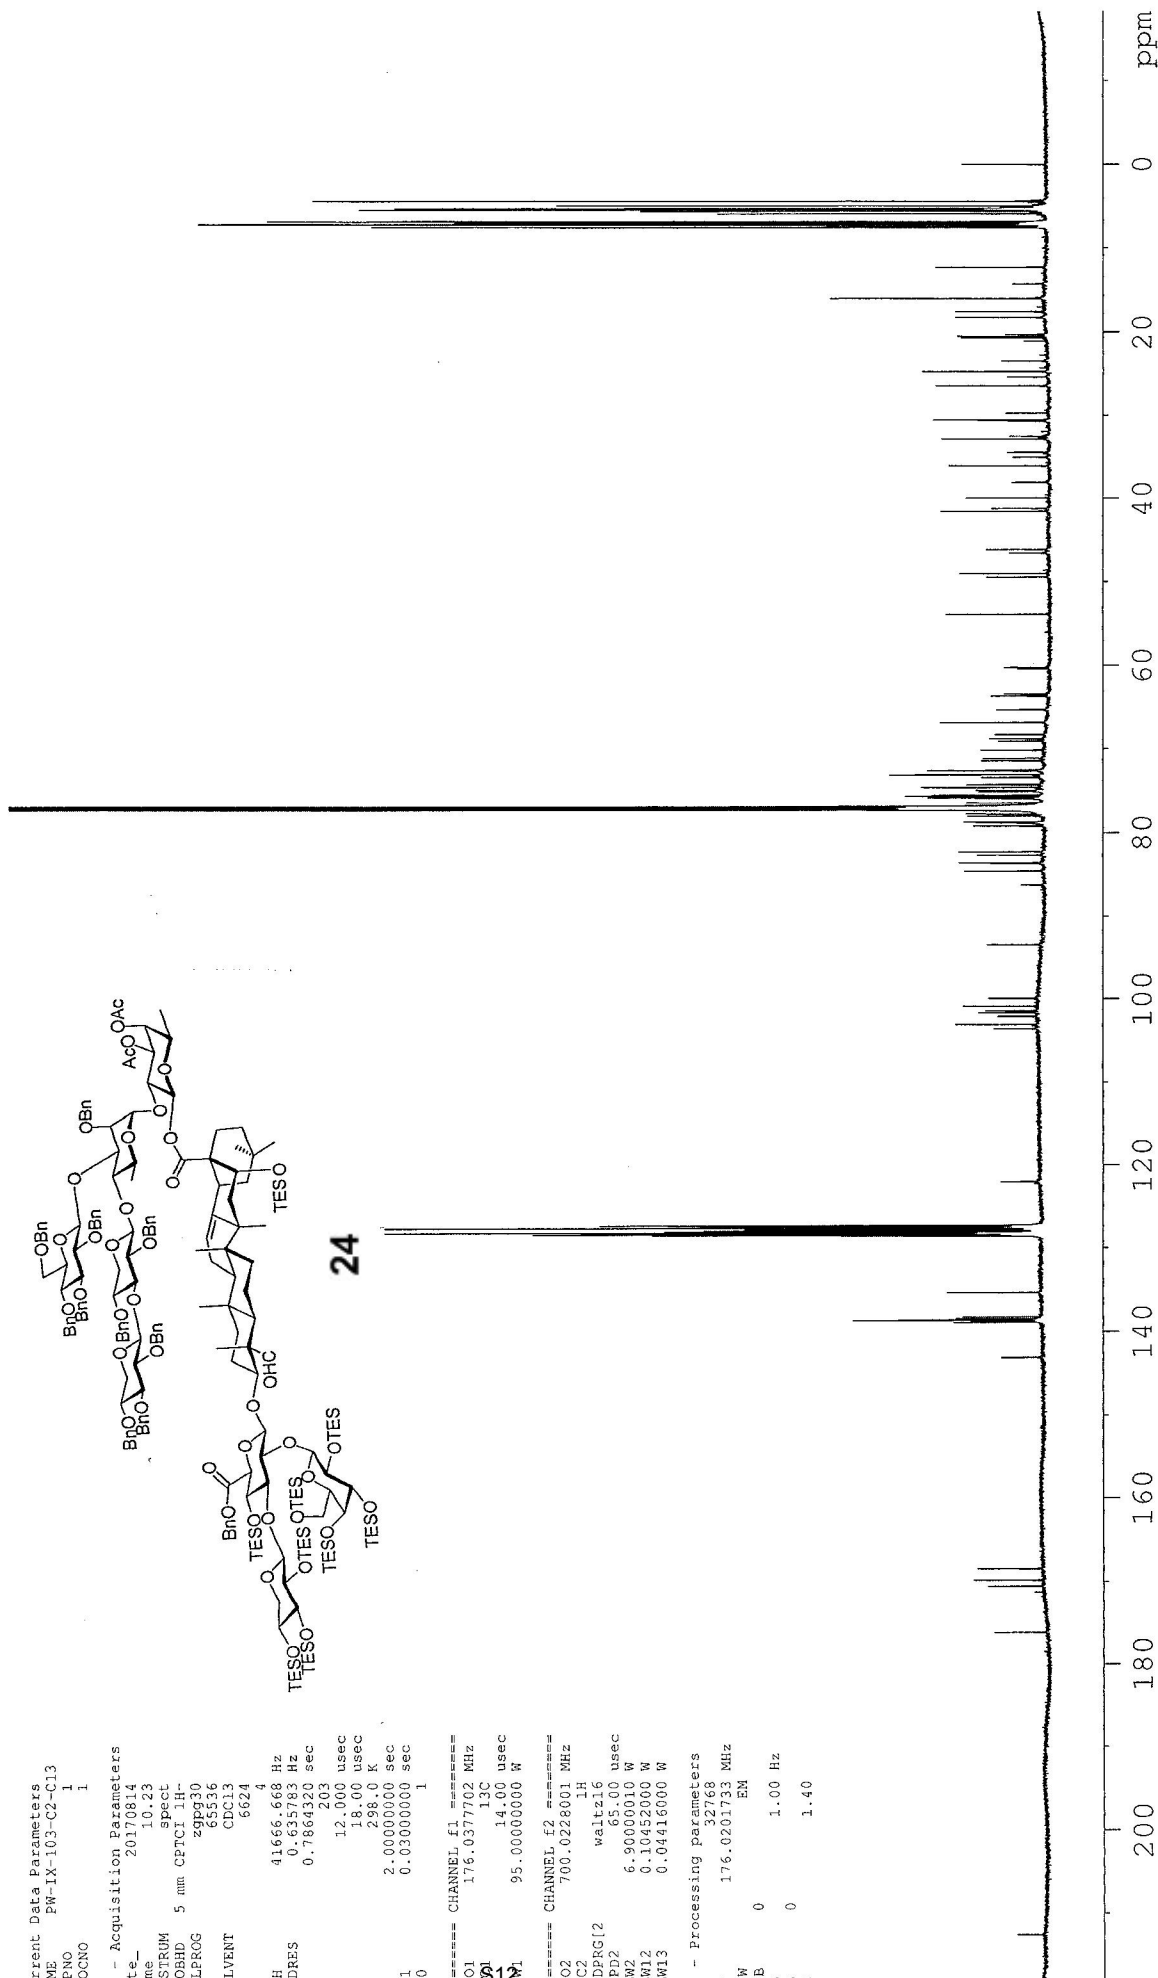

Current Data Parameters  
NAME PW-IX-5-HPLC-1  
EXPNO 1  
PROCNO 1

F2 - Acquisition Parameters  
Date\_ 20160509  
Time 8.40

INSTRUM spect  
PROBHD 5 mm CPTCLH  
PULPROG zgpg  
TD 65536  
SOLVENT MeOD  
NS 16  
DS 2

SWH 14097.744 Hz  
FIDRES 0.215115 Hz  
AQ 2.13243434 sec  
RG 320.2  
DW 35.467 usec  
DE 10.00 usec  
TE 298.0 K  
D1 1.00000000 sec  
TD0 1

===== CHANNEL f1 =====  
SFO1 700.0243229 MHz  
NUC1 1H  
P1 8.00 usec  
PLW1 6.90000010 W

F2 - Processing parameters  
S1 65536  
SF 700.019925 MHz  
WDW no  
SSB 0  
LB 0 Hz  
GB 0  
PC 1.00

43

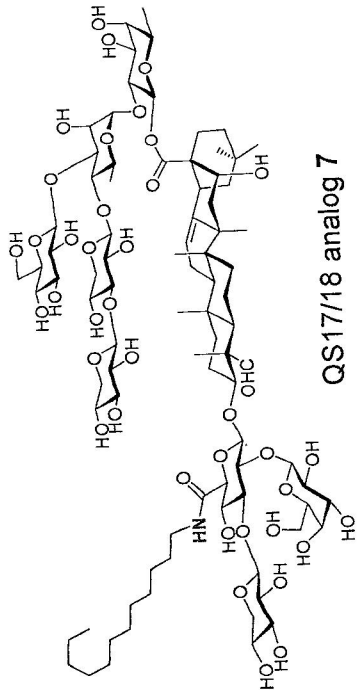

QS17/18 analog 7

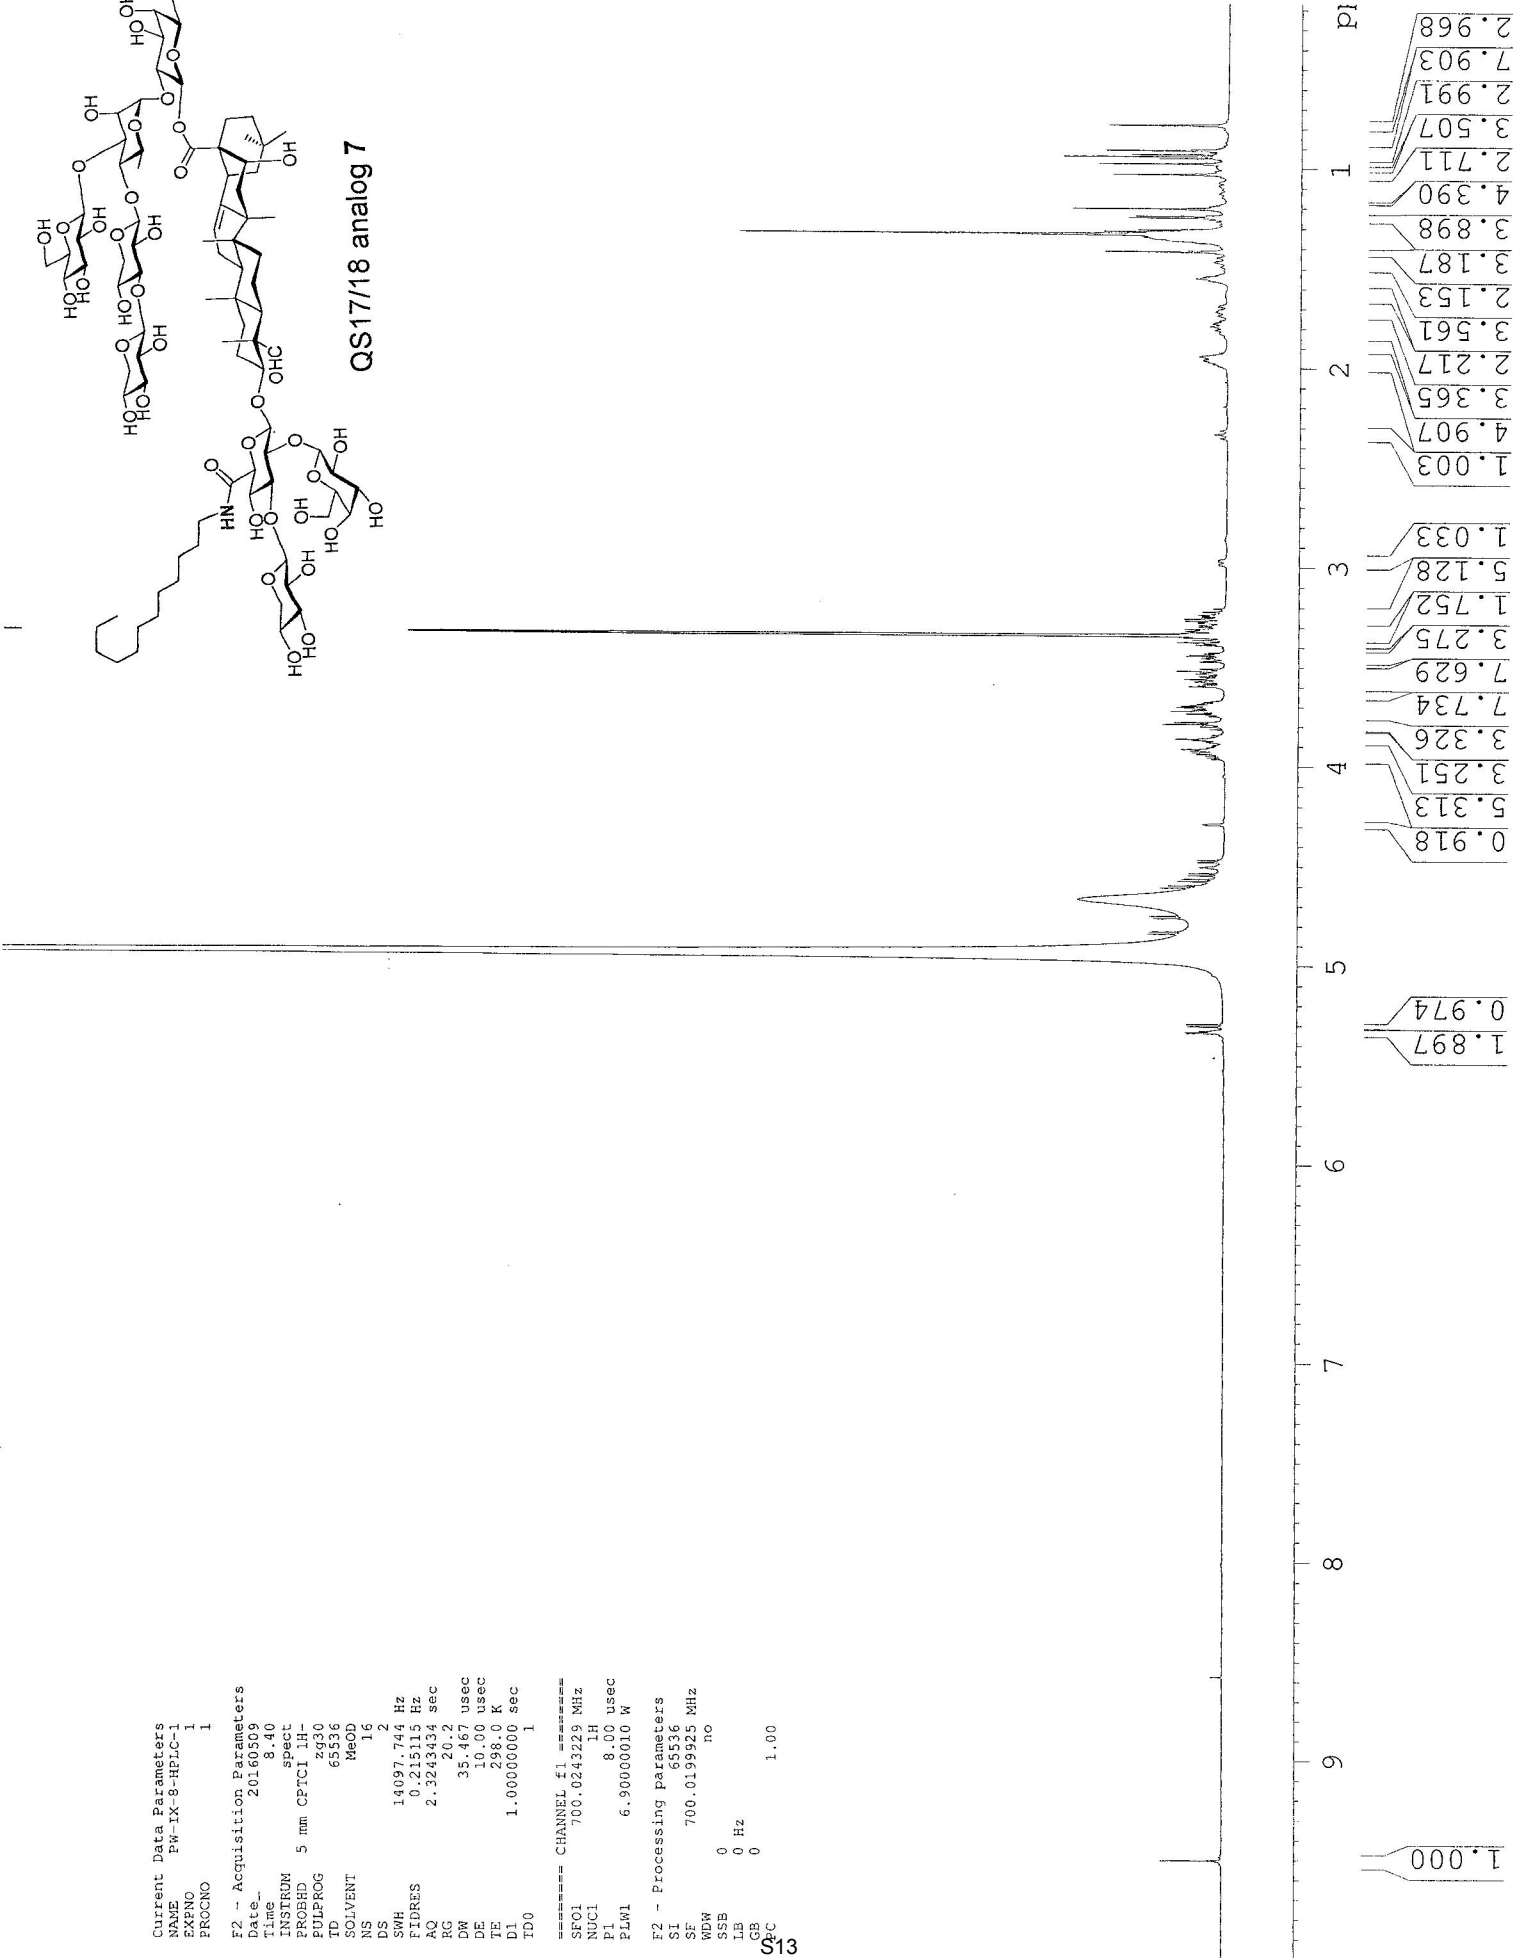

167.861  
104.739  
103.869  
103.707  
103.094  
103.013  
102.810  
100.907  
93.941  
84.793  
79.648  
77.086  
76.921  
76.522  
74.178  
73.927  
69.939  
69.808  
68.542  
66.155  
60.305  
54.351  
48.175  
41.448  
40.494  
40.356  
40.236  
40.117  
39.997  
39.878  
39.822  
39.759  
39.640  
38.634  
35.959  
33.308  
31.791  
31.763  
30.605  
29.709  
29.641  
29.623  
29.595  
29.543  
29.500  
29.436  
29.343  
29.247  
26.899  
26.684  
24.658  
22.600  
18.577  
17.062  
16.718  
15.911  
14.453  
10.930

Current Data Parameters  
NAME PW-IX-8-C13  
EXPNO 1  
PROCNO 1

F2 - Acquisition Parameters  
Date\_ 20160511  
Time 16.40  
INSTRUM spect  
PROBHD 5 mm CPTCI 1H-  
PULPROG zgpg30  
TD 65536  
SOLVENT DMSO  
NS 58424  
DS 4  
SWH 41666.668 Hz  
FIDRES 0.635783 Hz  
AQ 0.7864320 sec  
RG 256  
DW 12.000 usec  
DE 18.00 usec  
TE 303.0 K  
D1 2.00000000 sec  
D11 0.03000000 sec  
TD0 1

CHANNEL f1  
SFO1 176.0377702 MHz  
NUC1 13C  
P1 14.00 usec  
PLW1 95.00000000 W

CHANNEL f2  
SFO2 700.0228001 MHz  
NUC2 1H  
CPDPRG2 waltz16  
PCPD2 65.00 usec  
PLW2 6.90000010 W  
PLW12 0.10452000 W  
PLW13 0.04416000 W

F2 - Processing parameters  
SI 32768  
SF 176.0201690 MHz  
WDW no  
SSB 0  
LB 0 Hz  
GB 0  
PC 1.40

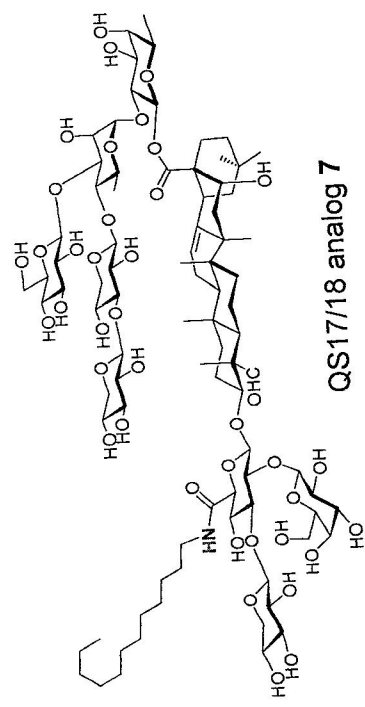

QS17/18 analog 7

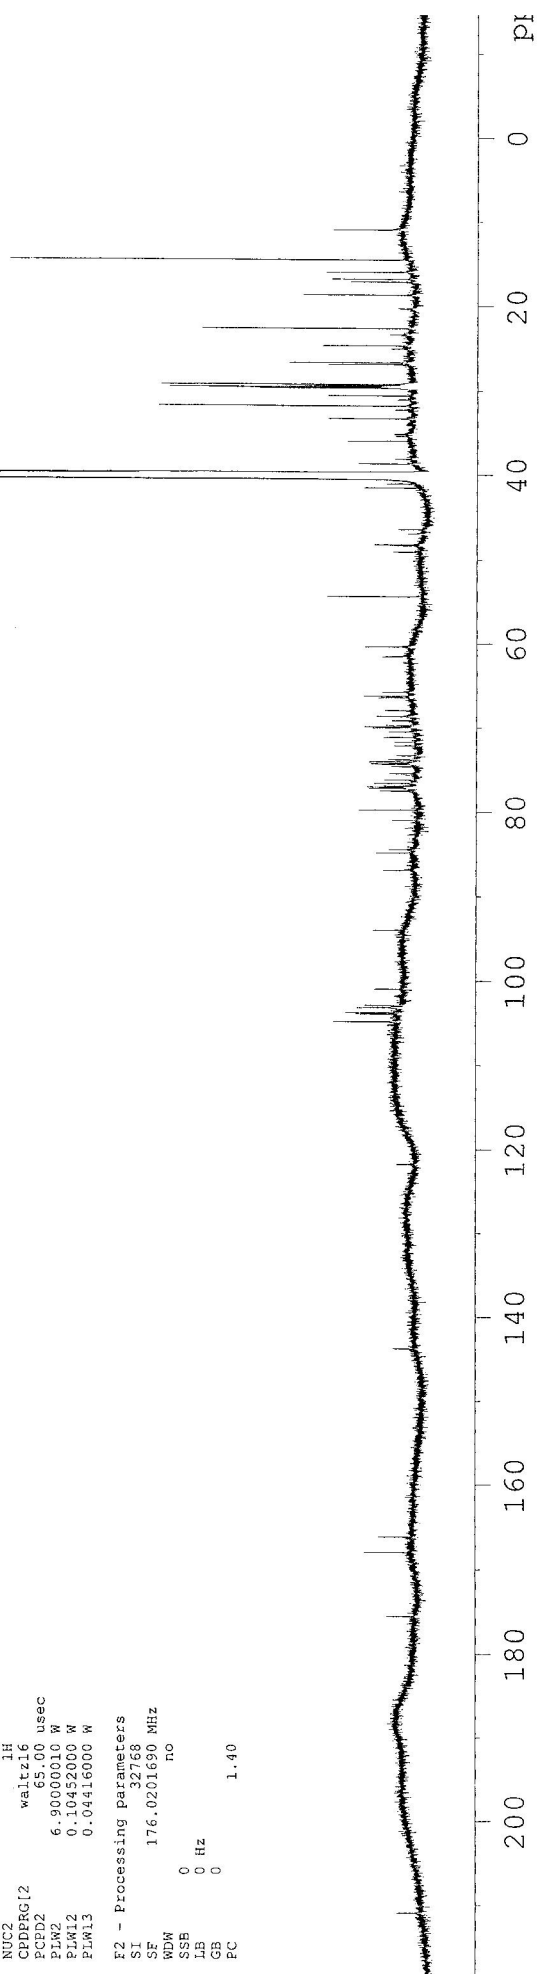

Supplement: Supplementary file 1 [file 14116589]
